# Supplementary material for: Deconvolution of Nucleic-acid Length Distributions: A Gel Electrophoresis Analysis Tool and Applications
Source: bioRxiv or medRxiv preprint supplement (doi:10.1101/636936), 2019-05-15
Supplement: Supplementary file [file media-1.pdf]

# Deconvolution of Nucleic-acid Length Distributions: A gel electrophoresis analysis tool and applications

## SUPPLEMENTARY FIGURES AND TABLES

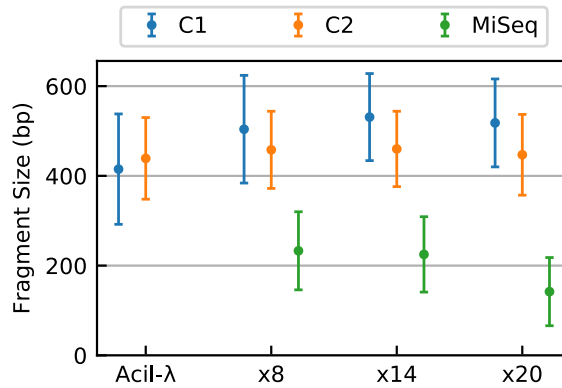

**Figure S1.** Comparison of average DNA-fragment size obtained from plug-in and MiSeq analysis of NGS libraries. NGS data are for phage-λ DNA libraries subjected to increasing numbers of PCR-amplification cycles as shown in Figure 2a. The same data are also reported in Table S1.

**Table S1.** Comparison of plug-in output for four camera systems (Table 1) used in acquiring images of the high-resolution gel, shown in Figure 2a. Uncertainty values in Tables are conservatively reported in terms of the standard deviation of the fragment-size distribution,  $\pm 1\sigma_d$ , as quantified by the plug-in. For this gel-purified sample, *MiSeq*<sup>®</sup> bioinformatic data are also available.

|                       | C1        | C2       | MiSeq <sup>®</sup> |
|-----------------------|-----------|----------|--------------------|
| λ- <i>Acil</i> Digest | 415 ± 123 | 439 ± 91 | -                  |
| 8 PCR Cycles          | 504 ± 120 | 458 ± 86 | 233 ± 87           |
| 14 PCR Cycles         | 531 ± 97  | 460 ± 84 | 225 ± 84           |
| 20 PCR Cycles         | 518 ± 98  | 447 ± 90 | 142 ± 76           |

**Table S2.** Comparison of plug-in output for four camera systems (Table 1.) used in acquiring images of the mini-gel, shown in Figure 2c. Uncertainty values in Tables are conservatively reported in terms of the standard deviation of the fragment-size distribution,  $\pm 1\sigma_d$ , as quantified by the plug-in.

|                       | C1        | C2        | C3        | C4        |
|-----------------------|-----------|-----------|-----------|-----------|
| λ- <i>Acil</i> Digest | 588 ± 140 | 568 ± 126 | 672 ± 131 | 638 ± 150 |
| 8 PCR Cycles          | 714 ± 124 | 659 ± 138 | 688 ± 128 | 678 ± 137 |
| 14 PCR Cycles         | 726 ± 112 | 672 ± 138 | 695 ± 122 | 695 ± 131 |
| 20 PCR Cycles         | 680 ± 124 | 667 ± 135 | 679 ± 125 | 670 ± 134 |

**Table S3.** Tabular data for the plot in Figure 6b, 6c. Size distribution average  $\pm 1\sigma_d$ , standard deviation. The estimated average fragment size for the λ-*Acil* sample is 329 and 734 bp for the *low*-MW and *high*-MW fractions, respectively.

| ROI | Low Cut  |          | High Cut  |           |
|-----|----------|----------|-----------|-----------|
|     | Low Ex.  | High Ex. | Low Ex.   | High Ex.  |
| 2   | 378 ± 66 | 400 ± 54 | 736 ± 125 | 723 ± 111 |
| 3   | 385 ± 62 | 405 ± 51 | 755 ± 136 | 742 ± 125 |
| 4   | 386 ± 81 | 354 ± 87 | 763 ± 138 | 761 ± 131 |
| 5   | 397 ± 61 | 416 ± 55 | 718 ± 135 | 724 ± 122 |
| 6   | 366 ± 83 | 325 ± 72 | 830 ± 135 | 850 ± 128 |
| 7   | 385 ± 64 | 403 ± 52 | 712 ± 131 | 737 ± 130 |

2

**Table S4.** Comparison of the distributions’ average fragment size calculations when using different subsets of the reference fragment distribution, the  $\lambda$ -*AciI* digest. Size distribution average  $\pm 1\sigma_d$ , standard deviation.

| ROI | Full $\lambda$ - <i>AciI</i> | 3:4 $\lambda$ - <i>AciI</i> | 2:3 $\lambda$ - <i>AciI</i> | 1:2 $\lambda$ - <i>AciI</i> | Ladder        | MiSeq <sup>®</sup> |
|-----|------------------------------|-----------------------------|-----------------------------|-----------------------------|---------------|--------------------|
| 2   | 841 $\pm$ 174                | 857 $\pm$ 180               | 869 $\pm$ 188               | 845 $\pm$ 183               | 829 $\pm$ 145 | -                  |
| 3   | 728 $\pm$ 191                | 706 $\pm$ 172               | 749 $\pm$ 222               | 694 $\pm$ 181               | 719 $\pm$ 151 | -                  |
| 4   | 753 $\pm$ 177                | 740 $\pm$ 171               | 752 $\pm$ 197               | 773 $\pm$ 200               | 747 $\pm$ 148 | 617 $\pm$ 199      |
| 5   | 830 $\pm$ 178                | 838 $\pm$ 180               | 859 $\pm$ 194               | 837 $\pm$ 194               | 837 $\pm$ 145 | 609 $\pm$ 101      |
| 6   | 724 $\pm$ 172                | 735 $\pm$ 171               | 728 $\pm$ 186               | 750 $\pm$ 191               | 733 $\pm$ 147 | 610 $\pm$ 193      |
| 7   | 761 $\pm$ 203                | 737 $\pm$ 184               | 727 $\pm$ 176               | 725 $\pm$ 179               | 735 $\pm$ 159 | -                  |
| 8   | 788 $\pm$ 194                | 784 $\pm$ 193               | 786 $\pm$ 192               | 822 $\pm$ 223               | 774 $\pm$ 172 | -                  |

**Table S5.** Profile fit accuracy as absolute RMS for the fits for the gel in Figure 5a

| ROI | Full $\lambda$ - <i>AciI</i> | 3:4 $\lambda$ - <i>AciI</i> | 2:3 $\lambda$ - <i>AciI</i> | 1:2 $\lambda$ - <i>AciI</i> | Ladder |
|-----|------------------------------|-----------------------------|-----------------------------|-----------------------------|--------|
| 1   | 467.6                        | 467.6                       | 467.6                       | 467.6                       | 461.5  |
| 2   | 179.7                        | 119.7                       | 109.9                       | 212.1                       | 641.2  |
| 3   | 74.1                         | 94.3                        | 85.6                        | 132.5                       | 662.9  |
| 4   | 160.4                        | 27.2                        | 65.6                        | 201.6                       | 111.9  |
| 5   | 140.5                        | 57.2                        | 101.2                       | 169.4                       | 673.6  |
| 6   | 188.7                        | 27.9                        | 142.8                       | 159.7                       | 108.4  |
| 7   | 121.1                        | 190.9                       | 48.2                        | 98.4                        | 482.8  |
| 8   | 17.8                         | 17.9                        | 72.9                        | 46.0                        | 124.0  |

**Table S6.** Plug-in output compared with TapeStation results. Size-distribution average  $\pm 1\sigma_d$ , standard deviation, for the plugin output. The calculated average for the  $\lambda$ -*AciI* sample is 398 and 871 bp for the *low* and *high* gel portions respectively. The labels in the 2<sup>nd</sup> and 5<sup>th</sup> columns, as well as the TS sizes, refer to the plots in section TapeStation Output.

| ROI |                         | Low Cut Plugin | TS  |                         | High Cut Plugin | TS   |
|-----|-------------------------|----------------|-----|-------------------------|-----------------|------|
| 2   | $\lambda$ - <i>AciI</i> | 378 $\pm$ 66   | -   | $\lambda$ - <i>AciI</i> | 736 $\pm$ 125   | -    |
| 3   | $\lambda$ - <i>AciI</i> | 385 $\pm$ 62   | -   | $\lambda$ - <i>AciI</i> | 755 $\pm$ 136   | -    |
| 4   | F1:5                    | 386 $\pm$ 81   | 410 | B1:1                    | 763 $\pm$ 138   | 1046 |
| 5   | G1:6                    | 397 $\pm$ 61   | 391 | C1:2                    | 718 $\pm$ 135   | 985  |
| 6   | H1:7                    | 366 $\pm$ 83   | 555 | D1:3                    | 830 $\pm$ 135   | 1554 |
| 7   | A2:8                    | 385 $\pm$ 64   | 475 | E1:4                    | 712 $\pm$ 131   | 1448 |

TAPESTATION OUTPUT

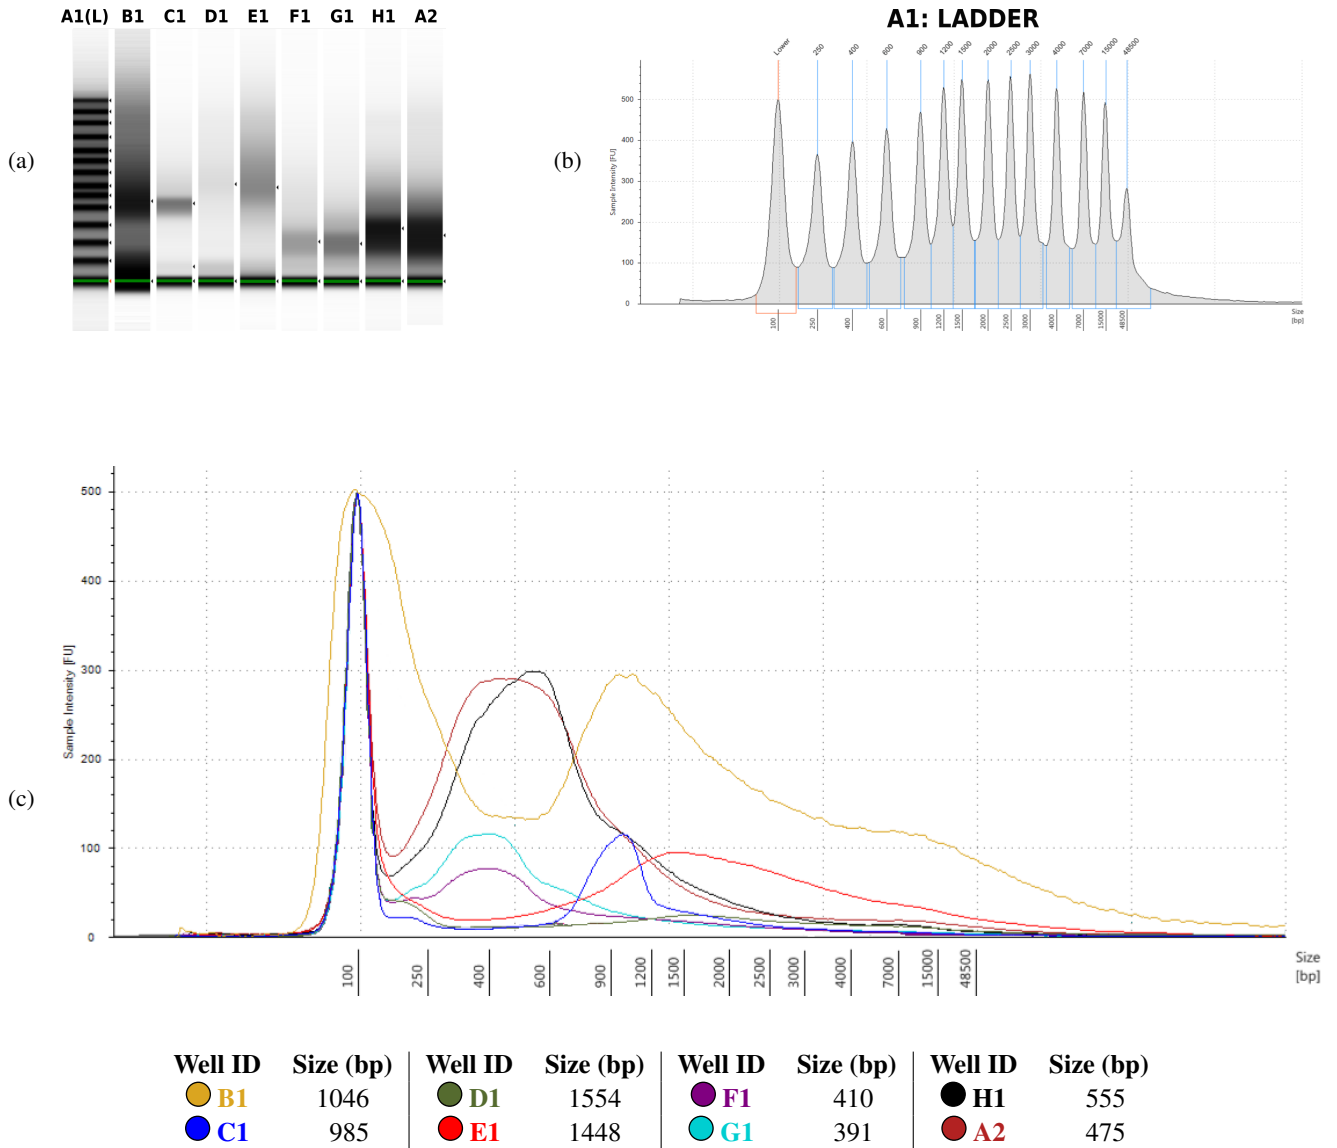

**Figure S2.** TapeStation<sup>®</sup> capillary-electrophoretic analysis of tagmented libraries prepared from *C. elegans* genomic DNA. Standard agarose-gel characterization of these libraries is shown in Figure 6. **(a)** original sample profile from the TS, **(b)** the line profile for the ladder of standards ((a), A1(L)) with the location of the peaks; **(c)** line profiles of the analyzed samples and respective main peak location (bp).
